# Supplementary material
Source: PubMed Central journal article supplement (PMC9470769)
Supplement: NIHMS1789166-supplement-3.pdf [file NIHMS1789166-supplement-3.pdf]

**Study Visit 1:**  
Sinus Endoscopy  
CT scan  
Sweat Chloride  
Spirometry and BMI

**Start Drug**

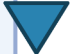

6 months (actual median 9 mo)

**Study Visit 2:**  
Sinus Endoscopy  
CT scan  
Sweat Chloride  
Spirometry and BMI

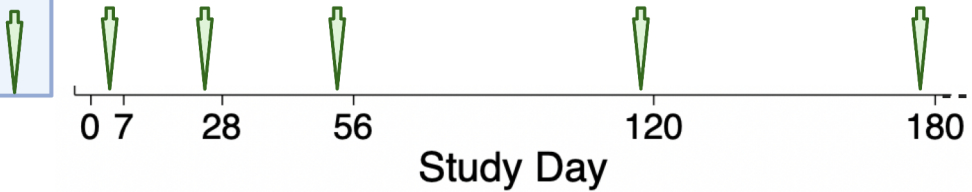

**SNOT-22 (Symptom Scale) Measurements - green arrows**
